# Supplementary material
Source: PubMed Central journal article supplement (PMC3667412)
Supplement: NIHMS449535-supplement-Supp_Table_6.pdf [file NIHMS449535-supplement-Supp_Table_6.pdf]

| <b>Biological Process</b>           | <b>NCBI: H. sapiens genes - REFLIST (25431 genes)</b> | <b>transcripts (448 genes)</b> | <b>transcripts (genes expected)</b> | <b>transcripts (over/under)</b> | <b>transcripts (P-value)</b> |
|-------------------------------------|-------------------------------------------------------|--------------------------------|-------------------------------------|---------------------------------|------------------------------|
| Biological process unclassified     | 11321                                                 | 102                            | 199                                 | -                               | 0.0000                       |
| Signal transduction                 | 3406                                                  | 107                            | 60                                  | +                               | 0.0000                       |
| Cell communication                  | 1213                                                  | 45                             | 21                                  | +                               | 0.0004                       |
| Nucleoside, nucleotide and nucleic  | 3343                                                  | 90                             | 59                                  | +                               | 0.0008                       |
| Neurogenesis                        | 587                                                   | 27                             | 10                                  | +                               | 0.0017                       |
| Phosphate transport                 | 17                                                    | 5                              | 0                                   | +                               | 0.0022                       |
| Ion transport                       | 616                                                   | 26                             | 11                                  | +                               | 0.0074                       |
| Apoptosis                           | 531                                                   | 22                             | 9                                   | +                               | 0.0076                       |
| Ectoderm development                | 692                                                   | 28                             | 12                                  | +                               | 0.0079                       |
| Immunity and defense                | 1318                                                  | 41                             | 23                                  | +                               | 0.0113                       |
| Transport                           | 1306                                                  | 40                             | 23                                  | +                               | 0.0180                       |
| Nerve-nerve synaptic transmission   | 81                                                    | 8                              | 1                                   | +                               | 0.0230                       |
| Protein phosphorylation             | 660                                                   | 26                             | 12                                  | +                               | 0.0301                       |
| Cation transport                    | 482                                                   | 21                             | 8                                   | +                               | 0.0346                       |
| Phosphate metabolism                | 117                                                   | 8                              | 2                                   | +                               | 0.0396                       |
| Ligand-mediated signaling           | 421                                                   | 19                             | 7                                   | +                               | 0.0452                       |
| Protein modification                | 1157                                                  | 37                             | 20                                  | +                               | 0.0620                       |
| Intracellular signaling cascade     | 871                                                   | 30                             | 15                                  | +                               | 0.0676                       |
| Inhibition of apoptosis             | 128                                                   | 9                              | 2                                   | +                               | 0.0774                       |
| Homeostasis                         | 196                                                   | 10                             | 3                                   | +                               | 0.0895                       |
| Neuronal activities                 | 569                                                   | 20                             | 10                                  | +                               | 0.0983                       |
| Developmental processes             | 2152                                                  | 55                             | 38                                  | +                               | 0.1140                       |
| Cytokine and chemokine mediated     | 252                                                   | 13                             | 4                                   | +                               | 0.1310                       |
| Cell surface receptor mediated sigr | 1638                                                  | 45                             | 29                                  | +                               | 0.3390                       |
| NF-kappaB cascade                   | 71                                                    | 6                              | 1                                   | +                               | 0.3580                       |
| Intracellular protein traffic       | 1008                                                  | 28                             | 18                                  | +                               | 0.4060                       |
| Cell cycle                          | 1009                                                  | 27                             | 18                                  | +                               | 0.6920                       |
| Amino acid metabolism               | 230                                                   | 9                              | 4                                   | +                               | 0.6940                       |
| Protein metabolism and modificatic  | 3040                                                  | 68                             | 54                                  | +                               | 0.7390                       |
| Extracellular transport and import  | 89                                                    | 6                              | 2                                   | +                               | 0.7820                       |
| Receptor protein tyrosine kinase si | 211                                                   | 9                              | 4                                   | +                               | 1.0000                       |
| G-protein mediated signaling        | 834                                                   | 16                             | 15                                  | +                               | 1.0000                       |
| Oncogene                            | 122                                                   | 4                              | 2                                   | +                               | 1.0000                       |
| Tumor suppressor                    | 102                                                   | 3                              | 2                                   | +                               | 1.0000                       |
| Sulfur metabolism                   | 93                                                    | 2                              | 2                                   | +                               | 1.0000                       |
| Protein glycosylation               | 193                                                   | 7                              | 3                                   | +                               | 1.0000                       |
| Cytokine/chemokine mediated imm     | 125                                                   | 6                              | 2                                   | +                               | 1.0000                       |
| Induction of apoptosis              | 165                                                   | 8                              | 3                                   | +                               | 1.0000                       |
| Sex determination                   | 14                                                    | 1                              | 0                                   | +                               | 1.0000                       |
| Heart development                   | 51                                                    | 2                              | 1                                   | +                               | 1.0000                       |
| Metabolism of cyclic nucleotides    | 45                                                    | 2                              | 1                                   | +                               | 1.0000                       |
| rRNA metabolism                     | 66                                                    | 3                              | 1                                   | +                               | 1.0000                       |
| tRNA metabolism                     | 42                                                    | 2                              | 1                                   | +                               | 1.0000                       |

|                                        |      |    |    |   |        |
|----------------------------------------|------|----|----|---|--------|
| RNA localization                       | 33   | 2  | 1  | + | 1.0000 |
| Reverse transcription                  | 9    | 1  | 0  | + | 1.0000 |
| mRNA end-processing and stability      | 20   | 2  | 0  | + | 1.0000 |
| Mesoderm development                   | 551  | 12 | 10 | + | 1.0000 |
| Anterior/posterior patterning          | 67   | 2  | 1  | + | 1.0000 |
| Determination of dorsal/ventral axis   | 16   | 1  | 0  | + | 1.0000 |
| mRNA polyadenylation                   | 28   | 1  | 0  | + | 1.0000 |
| mRNA splicing                          | 214  | 5  | 4  | + | 1.0000 |
| Pre-mRNA processing                    | 291  | 8  | 5  | + | 1.0000 |
| Fertilization                          | 41   | 1  | 1  | + | 1.0000 |
| mRNA transcription regulation          | 1459 | 33 | 26 | + | 1.0000 |
| mRNA transcription elongation          | 44   | 1  | 1  | + | 1.0000 |
| General mRNA transcription activiti    | 45   | 2  | 1  | + | 1.0000 |
| mRNA transcription                     | 1914 | 48 | 34 | + | 1.0000 |
| Other apoptosis                        | 14   | 1  | 0  | + | 1.0000 |
| DNA recombination                      | 44   | 1  | 1  | + | 1.0000 |
| DNA repair                             | 169  | 4  | 3  | + | 1.0000 |
| DNA replication                        | 155  | 3  | 3  | + | 1.0000 |
| Spermatogenesis and motility           | 129  | 4  | 2  | + | 1.0000 |
| DNA metabolism                         | 360  | 7  | 6  | + | 1.0000 |
| Pyrimidine metabolism                  | 42   | 2  | 1  | + | 1.0000 |
| Purine metabolism                      | 65   | 3  | 1  | + | 1.0000 |
| Gametogenesis                          | 241  | 6  | 4  | + | 1.0000 |
| Cell proliferation and differentiation | 1028 | 26 | 18 | + | 1.0000 |
| Angiogenesis                           | 54   | 1  | 1  | + | 1.0000 |
| Lipid and fatty acid transport         | 131  | 3  | 2  | + | 1.0000 |
| Vision                                 | 199  | 6  | 4  | + | 1.0000 |
| Fatty acid metabolism                  | 187  | 6  | 3  | + | 1.0000 |
| Detoxification                         | 71   | 2  | 1  | + | 1.0000 |
| Lipid, fatty acid and steroid metabo   | 770  | 17 | 14 | + | 1.0000 |
| Other amino acid metabolism            | 30   | 1  | 1  | + | 1.0000 |
| Miscellaneous                          | 140  | 3  | 2  | + | 1.0000 |
| Amino acid catabolism                  | 50   | 2  | 1  | + | 1.0000 |
| Amino acid transport                   | 47   | 2  | 1  | + | 1.0000 |
| Stress response                        | 200  | 5  | 4  | + | 1.0000 |
| Blood clotting                         | 92   | 3  | 2  | + | 1.0000 |
| Other neuronal activity                | 136  | 6  | 2  | + | 1.0000 |
| Cell cycle control                     | 418  | 14 | 7  | + | 1.0000 |
| Chromosome segregation                 | 121  | 3  | 2  | + | 1.0000 |
| Other polysaccharide metabolism        | 142  | 6  | 3  | + | 1.0000 |
| Other developmental process            | 104  | 2  | 2  | + | 1.0000 |
| Tricarboxylic acid pathway             | 36   | 1  | 1  | + | 1.0000 |
| Skeletal development                   | 123  | 3  | 2  | + | 1.0000 |
| Lactation, mammary development         | 13   | 1  | 0  | + | 1.0000 |
| Gluconeogenesis                        | 17   | 2  | 0  | + | 1.0000 |
| Glycolysis                             | 46   | 1  | 1  | + | 1.0000 |

|                                      |      |    |    |   |        |
|--------------------------------------|------|----|----|---|--------|
| Synaptic transmission                | 279  | 11 | 5  | + | 1.0000 |
| Carbohydrate transport               | 50   | 1  | 1  | + | 1.0000 |
| Carbohydrate metabolism              | 592  | 13 | 10 | + | 1.0000 |
| Other immune and defense             | 153  | 5  | 3  | + | 1.0000 |
| Interferon-mediated immunity         | 63   | 2  | 1  | + | 1.0000 |
| Complement-mediated immunity         | 56   | 2  | 1  | + | 1.0000 |
| B-cell- and antibody-mediated imm    | 97   | 3  | 2  | + | 1.0000 |
| T-cell mediated immunity             | 194  | 4  | 3  | + | 1.0000 |
| Other transport                      | 61   | 2  | 1  | + | 1.0000 |
| Anion transport                      | 90   | 5  | 2  | + | 1.0000 |
| Other protein targeting and localiza | 18   | 1  | 0  | + | 1.0000 |
| Asymmetric protein localization      | 20   | 1  | 0  | + | 1.0000 |
| Protein targeting                    | 113  | 3  | 2  | + | 1.0000 |
| Protein targeting and localization   | 253  | 6  | 4  | + | 1.0000 |
| Other intracellular protein traffic  | 62   | 3  | 1  | + | 1.0000 |
| Mitochondrial transport              | 27   | 1  | 0  | + | 1.0000 |
| Nuclear transport                    | 135  | 4  | 2  | + | 1.0000 |
| Receptor mediated endocytosis        | 111  | 4  | 2  | + | 1.0000 |
| Other sulfur metabolism              | 17   | 1  | 0  | + | 1.0000 |
| Calcium ion homeostasis              | 38   | 3  | 1  | + | 1.0000 |
| Lipid metabolism                     | 151  | 4  | 3  | + | 1.0000 |
| Nitric oxide biosynthesis            | 7    | 1  | 0  | + | 1.0000 |
| Nitrogen metabolism                  | 21   | 1  | 0  | + | 1.0000 |
| Endocytosis                          | 277  | 10 | 5  | + | 1.0000 |
| Other metabolism                     | 559  | 11 | 10 | + | 1.0000 |
| Granulocyte-mediated immunity        | 64   | 2  | 1  | + | 1.0000 |
| Cell motility                        | 352  | 12 | 6  | + | 1.0000 |
| Cell adhesion                        | 622  | 16 | 11 | + | 1.0000 |
| Cell structure and motility          | 1148 | 25 | 20 | + | 1.0000 |
| Other signal transduction            | 71   | 2  | 1  | + | 1.0000 |
| Cell adhesion-mediated signaling     | 379  | 13 | 7  | + | 1.0000 |
| Mitosis                              | 382  | 9  | 7  | + | 1.0000 |
| Oncogenesis                          | 472  | 11 | 8  | + | 1.0000 |
| Other pathways of electron transpc   | 20   | 2  | 0  | + | 1.0000 |
| Other intracellular signaling cascad | 225  | 6  | 4  | + | 1.0000 |
| NO mediated signal transduction      | 10   | 2  | 0  | + | 1.0000 |
| JAK-STAT cascade                     | 85   | 4  | 2  | + | 1.0000 |
| JNK cascade                          | 61   | 2  | 1  | + | 1.0000 |
| Phagocytosis                         | 39   | 3  | 1  | + | 1.0000 |
| General vesicle transport            | 251  | 7  | 4  | + | 1.0000 |
| MAPKKK cascade                       | 181  | 7  | 3  | + | 1.0000 |
| Extracellular matrix protein-mediat  | 62   | 2  | 1  | + | 1.0000 |
| Calcium mediated signaling           | 116  | 4  | 2  | + | 1.0000 |
| Chromatin packaging and remodeli     | 237  | 10 | 4  | + | 1.0000 |
| Phospholipid metabolism              | 151  | 4  | 3  | + | 1.0000 |
| Other receptor mediated signaling    | 210  | 4  | 4  | + | 1.0000 |

|                                        |     |    |    |   |        |
|----------------------------------------|-----|----|----|---|--------|
| Other homeostasis activities           | 69  | 3  | 1  | + | 1.0000 |
| Other protein metabolism               | 48  | 1  | 1  | + | 1.0000 |
| Amino acid activation                  | 38  | 1  | 1  | + | 1.0000 |
| Proteolysis                            | 960 | 18 | 17 | + | 1.0000 |
| Receptor protein serine/threonine k    | 40  | 0  | 1  | - | 1.0000 |
| Non-vertebrate process                 | 20  | 0  | 0  | - | 1.0000 |
| Glucose homeostasis                    | 20  | 0  | 0  | - | 1.0000 |
| Antioxidation and free radical remo    | 38  | 0  | 1  | - | 1.0000 |
| Protein disulfide-isomerase reactio    | 17  | 0  | 0  | - | 1.0000 |
| Other phosphate metabolism             | 1   | 0  | 0  | - | 1.0000 |
| Protein ADP-ribosylation               | 10  | 0  | 0  | - | 1.0000 |
| Protein acetylation                    | 29  | 0  | 1  | - | 1.0000 |
| Protein methylation                    | 10  | 0  | 0  | - | 1.0000 |
| Protein folding                        | 186 | 3  | 3  | - | 1.0000 |
| Protein biosynthesis                   | 591 | 8  | 10 | - | 1.0000 |
| RNA catabolism                         | 65  | 0  | 1  | - | 1.0000 |
| Apoptotic processes                    | 18  | 0  | 0  | - | 1.0000 |
| Other nucleoside, nucleotide and n     | 29  | 0  | 1  | - | 1.0000 |
| Nucleoside, nucleotide and nucleic     | 58  | 1  | 1  | - | 1.0000 |
| Regulation of nucleoside, nucleotid    | 15  | 0  | 0  | - | 1.0000 |
| Muscle development                     | 143 | 0  | 3  | - | 1.0000 |
| mRNA capping                           | 3   | 0  | 0  | - | 1.0000 |
| Gut mesoderm development               | 14  | 0  | 0  | - | 1.0000 |
| Endoderm development                   | 12  | 0  | 0  | - | 1.0000 |
| Segment specification                  | 100 | 1  | 2  | - | 1.0000 |
| Embryogenesis                          | 141 | 2  | 2  | - | 1.0000 |
| Other mRNA transcription               | 21  | 0  | 0  | - | 1.0000 |
| mRNA transcription termination         | 10  | 0  | 0  | - | 1.0000 |
| mRNA transcription initiation          | 73  | 1  | 1  | - | 1.0000 |
| DNA degradation                        | 12  | 0  | 0  | - | 1.0000 |
| Oogenesis                              | 65  | 1  | 1  | - | 1.0000 |
| Meiosis                                | 84  | 1  | 1  | - | 1.0000 |
| Other lipid, fatty acid and steroid m  | 25  | 0  | 0  | - | 1.0000 |
| Other sensory perception               | 15  | 0  | 0  | - | 1.0000 |
| Pain sensation                         | 32  | 0  | 1  | - | 1.0000 |
| Lipid and fatty acid binding           | 27  | 0  | 0  | - | 1.0000 |
| Regulation of lipid, fatty acid and st | 27  | 0  | 0  | - | 1.0000 |
| Hearing                                | 39  | 0  | 1  | - | 1.0000 |
| Cholesterol metabolism                 | 68  | 1  | 1  | - | 1.0000 |
| Pheromone response                     | 9   | 0  | 0  | - | 1.0000 |
| Acyl-CoA metabolism                    | 22  | 0  | 0  | - | 1.0000 |
| Fatty acid desaturation                | 4   | 0  | 0  | - | 1.0000 |
| Taste                                  | 7   | 0  | 0  | - | 1.0000 |
| Fatty acid beta-oxidation              | 27  | 0  | 0  | - | 1.0000 |
| Olfaction                              | 198 | 0  | 3  | - | 1.0000 |
| Fatty acid biosynthesis                | 14  | 0  | 0  | - | 1.0000 |

|                                      |     |    |    |   |        |
|--------------------------------------|-----|----|----|---|--------|
| Chemosensory perception              | 207 | 0  | 4  | - | 1.0000 |
| Sensory perception                   | 506 | 6  | 9  | - | 1.0000 |
| Other blood circulation and gas exc  | 18  | 0  | 0  | - | 1.0000 |
| Amino acid metabolism regulation     | 2   | 0  | 0  | - | 1.0000 |
| Amino acid biosynthesis              | 46  | 0  | 1  | - | 1.0000 |
| Other carbohydrate metabolism        | 56  | 0  | 1  | - | 1.0000 |
| Regulation of vasoconstriction, dila | 43  | 0  | 1  | - | 1.0000 |
| Monosaccharide metabolism            | 43  | 0  | 1  | - | 1.0000 |
| Muscle contraction                   | 198 | 2  | 3  | - | 1.0000 |
| Disaccharide metabolism              | 5   | 0  | 0  | - | 1.0000 |
| Action potential propagation         | 23  | 0  | 0  | - | 1.0000 |
| Neuromuscular synaptic transmissi    | 23  | 0  | 0  | - | 1.0000 |
| Blood circulation and gas exchange   | 89  | 0  | 2  | - | 1.0000 |
| Other cell cycle process             | 9   | 0  | 0  | - | 1.0000 |
| Cytokinesis                          | 115 | 2  | 2  | - | 1.0000 |
| Pentose-phosphate shunt              | 10  | 0  | 0  | - | 1.0000 |
| Neurotransmitter release             | 107 | 1  | 2  | - | 1.0000 |
| Regulation of carbohydrate metabo    | 13  | 0  | 0  | - | 1.0000 |
| Natural killer cell mediated immunit | 74  | 1  | 1  | - | 1.0000 |
| Macrophage-mediated immunity         | 140 | 2  | 2  | - | 1.0000 |
| MHCII-mediated immunity              | 34  | 0  | 1  | - | 1.0000 |
| MHCI-mediated immunity               | 22  | 0  | 0  | - | 1.0000 |
| Small molecule transport             | 134 | 1  | 2  | - | 1.0000 |
| Steroid hormone metabolism           | 45  | 0  | 1  | - | 1.0000 |
| Glycogen metabolism                  | 52  | 0  | 1  | - | 1.0000 |
| Other steroid metabolism             | 13  | 0  | 0  | - | 1.0000 |
| Bile acid metabolism                 | 1   | 0  | 0  | - | 1.0000 |
| Steroid metabolism                   | 183 | 3  | 3  | - | 1.0000 |
| Other carbon metabolism              | 82  | 1  | 1  | - | 1.0000 |
| Polyphosphate biosynthesis           | 3   | 0  | 0  | - | 1.0000 |
| Regulation of phosphate metabolis    | 3   | 0  | 0  | - | 1.0000 |
| Polyphosphate catabolism             | 3   | 0  | 0  | - | 1.0000 |
| Other nitrogen metabolism            | 2   | 0  | 0  | - | 1.0000 |
| Nitrogen utilization                 | 6   | 0  | 0  | - | 1.0000 |
| Constitutive exocytosis              | 11  | 0  | 0  | - | 1.0000 |
| Regulated exocytosis                 | 48  | 0  | 1  | - | 1.0000 |
| Exocytosis                           | 163 | 0  | 3  | - | 1.0000 |
| Cell structure                       | 687 | 11 | 12 | - | 1.0000 |
| Hematopoiesis                        | 75  | 1  | 1  | - | 1.0000 |
| Other oncogenesis                    | 69  | 1  | 1  | - | 1.0000 |
| Steroid hormone-mediated signalin    | 52  | 0  | 1  | - | 1.0000 |
| Other coenzyme and prosthetic grc    | 9   | 0  | 0  | - | 1.0000 |
| Vitamin/cofactor transport           | 48  | 0  | 1  | - | 1.0000 |
| Lysosome transport                   | 12  | 0  | 0  | - | 1.0000 |
| Porphyrin metabolism                 | 15  | 0  | 0  | - | 1.0000 |
| Pterin metabolism                    | 8   | 0  | 0  | - | 1.0000 |

|                                 |     |   |   |   |        |
|---------------------------------|-----|---|---|---|--------|
| Vitamin catabolism              | 1   | 0 | 0 | - | 1.0000 |
| Vitamin biosynthesis            | 21  | 0 | 0 | - | 1.0000 |
| Vitamin metabolism              | 42  | 0 | 1 | - | 1.0000 |
| Coenzyme metabolism             | 61  | 0 | 1 | - | 1.0000 |
| Coenzyme and prosthetic group m | 174 | 0 | 3 | - | 1.0000 |
| Peroxisome transport            | 14  | 0 | 0 | - | 1.0000 |
| Pinocytosis                     | 7   | 0 | 0 | - | 1.0000 |
| Sulfur redox metabolism         | 20  | 0 | 0 | - | 1.0000 |
| Ferredoxin metabolism           | 4   | 0 | 0 | - | 1.0000 |
| Oxidative phosphorylation       | 78  | 0 | 1 | - | 1.0000 |
| Growth factor homeostasis       | 7   | 0 | 0 | - | 1.0000 |
| Electron transport              | 252 | 4 | 4 | - | 1.0000 |
| Translational regulation        | 88  | 1 | 2 | - | 1.0000 |
| Protein complex assembly        | 68  | 1 | 1 | - | 1.0000 |
| Protein-lipid modification      | 21  | 0 | 0 | - | 1.0000 |
